# Supplementary material for: Small molecule conjugates with selective estrogen receptor β agonism promote anti-aging benefits in metabolism and skin recovery
Source: PubMed Central journal article supplement — Acta Pharm Sin B. 2024 Jan 29;14(5):2137–52. doi: 10.1016/j.apsb.2024.01.014 (PMC11119546; doi:10.1016/j.apsb.2024.01.014), 2024-01-29
Supplement: mmc1.pdf [file mmc1.pdf]

**Supporting Information for**

**Original article**

**Small molecule conjugates with selective estrogen receptor  $\beta$  agonism promote anti-aging benefits in metabolism and skin recovery**

Tarik Zahr<sup>a,b,†</sup>, Vijay K Boda<sup>c,d,†</sup>, Jian Ge<sup>e,f,†</sup>, Lexiang Yu<sup>a,g</sup>, Zhongzhi Wu<sup>c,d</sup>, Jianwen Que<sup>e,f,\*</sup>, Wei Li<sup>c,d,\*</sup>, Li Qiang<sup>h,i,\*</sup>

<sup>a</sup>*Naomi Berrie Diabetes Center, Columbia University, New York, NY 10032, USA*

<sup>b</sup>*Department of Molecular Pharmacology and Therapeutics, Columbia University, New York, NY 10032, USA*

<sup>c</sup>*Department of Pharmaceutical Sciences, College of Pharmacy, University of Tennessee Health Science Center, Memphis, TN 38163, USA*

<sup>d</sup>*Drug Discovery Center, College of Pharmacy, University of Tennessee Health Science Center, Memphis, TN 38163, USA*

<sup>e</sup>*Division of Digestive and Liver Diseases, Department of Medicine, Columbia University, New York, NY 10032, USA*

<sup>f</sup>*Columbia Center for Human Development, Columbia University, New York, NY 10027, USA*

<sup>g</sup>*Department of Pathology and Cell Biology, Columbia University, New York, NY 10032, USA*

<sup>h</sup>*Department of Pharmacology, School of Basic Medical Sciences, Peking University, Beijing, 100191, China*

<sup>i</sup>*Division of Preventive Medicine and Nutrition, Department of Medicine, Columbia University, New York, NY 10032, USA*

Received 22 October 2023; received in revised form 13 December 2023; accepted 5 January 2024

\*Corresponding authors.

E-mail addresses: jq2240@cumc.columbia.edu (Jianwen Que), wli@uthsc.edu (Wei Li), lq2123@cumc.columbia.edu (Li Qiang).

†These authors made equal contributions to this work.

Running title: Anti-aging benefits of selective ER $\beta$  conjugate agonists in mice

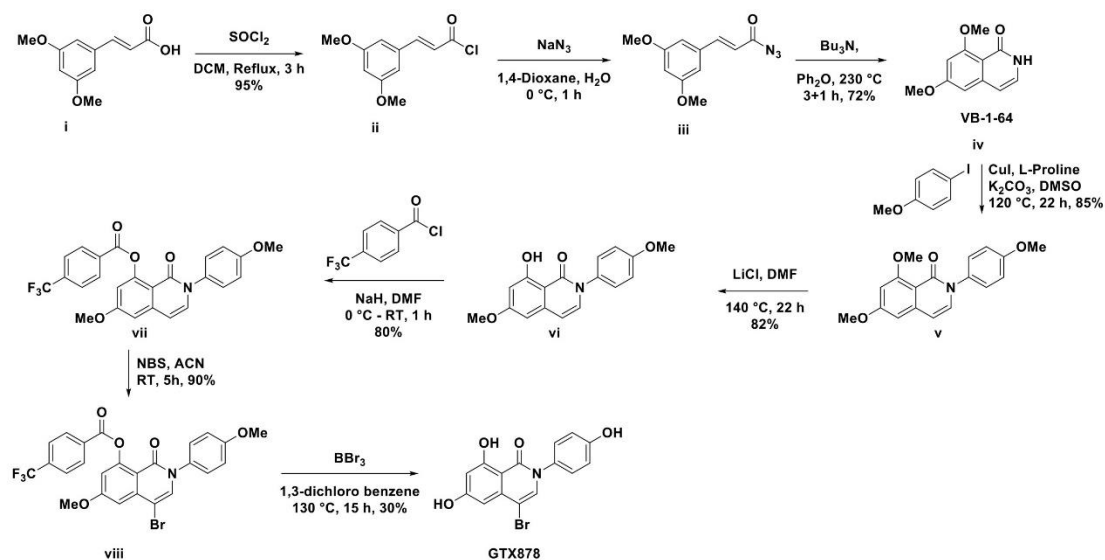

## Scheme S1.

Scheme S1. Synthesis of GTX-878 using an 8-step linear method.

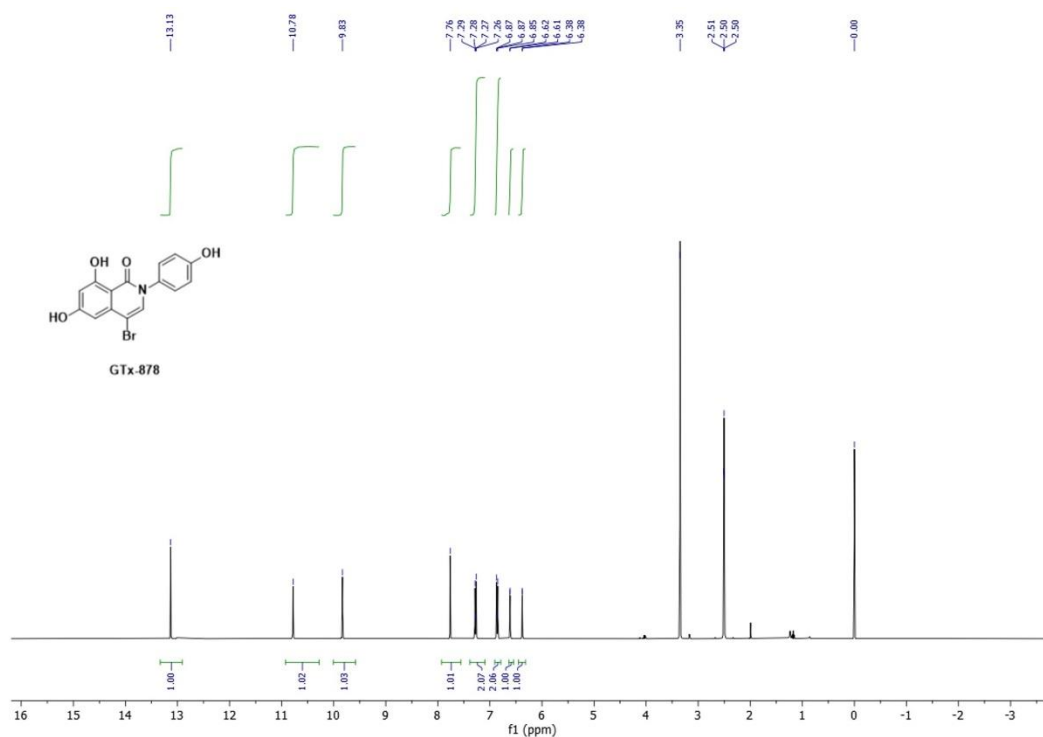

Figure S1.  $^1\text{H}$  NMR spectrum for GTX-878.

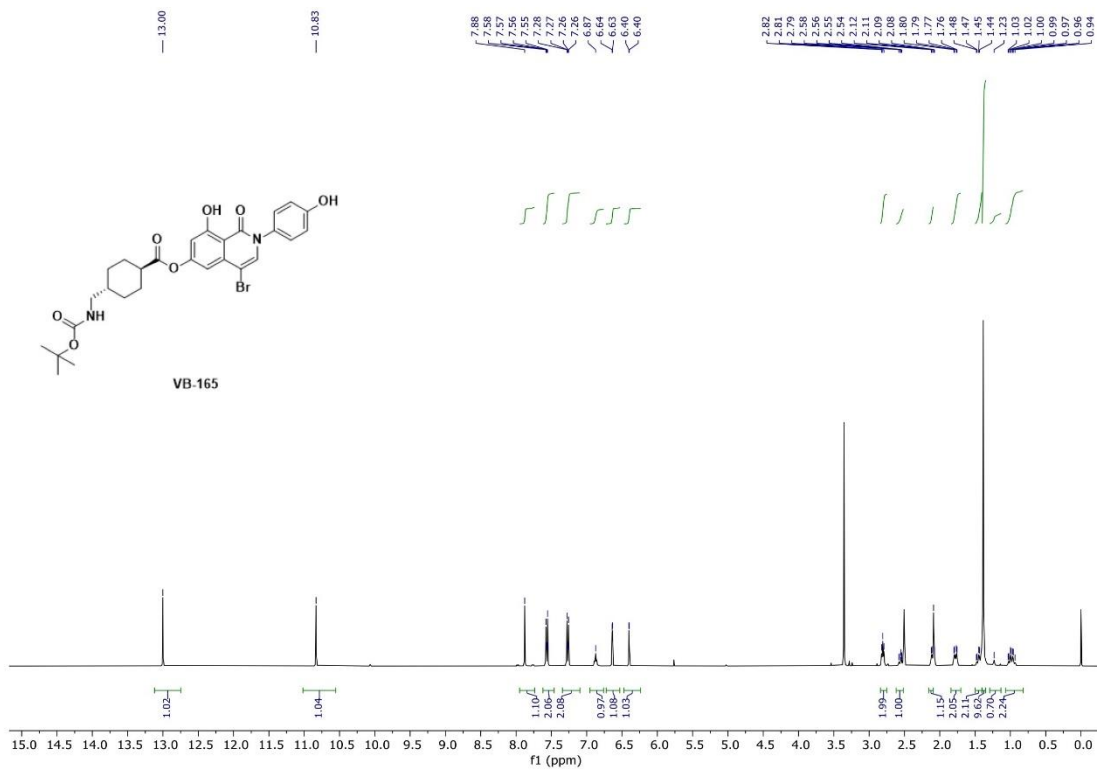

**Figure S2. <sup>1</sup>H NMR spectrum for VB-165.**

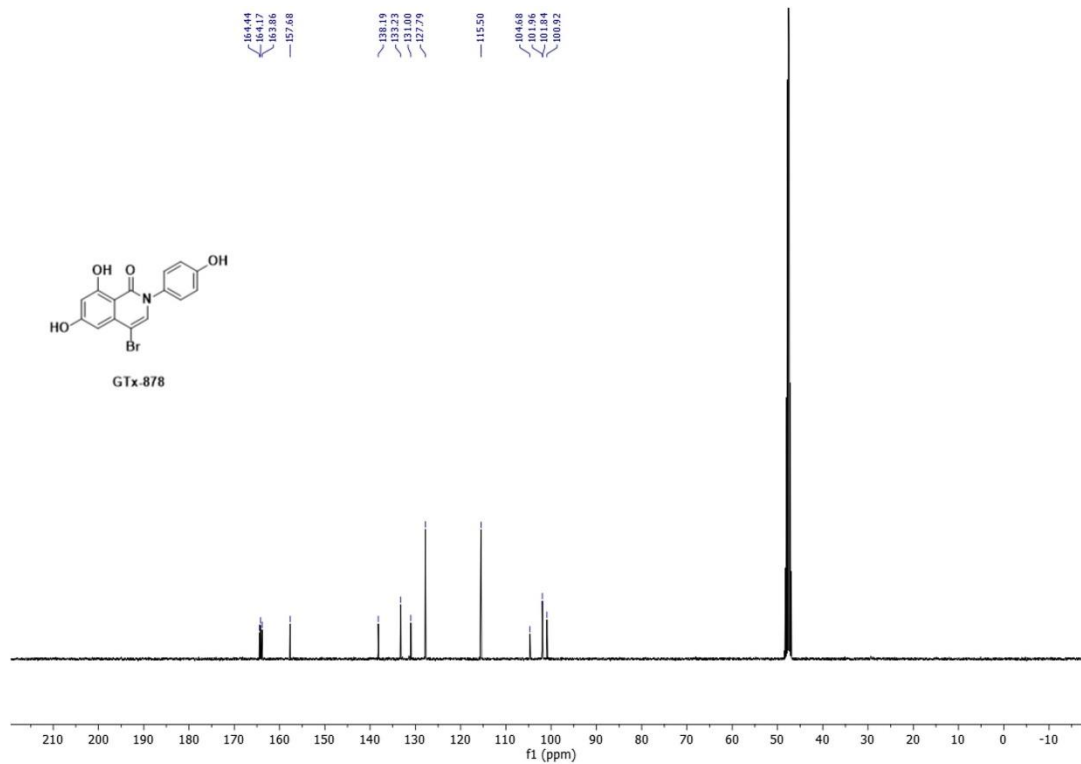

**Figure S3. <sup>13</sup>C NMR spectrum for GTX-878.**

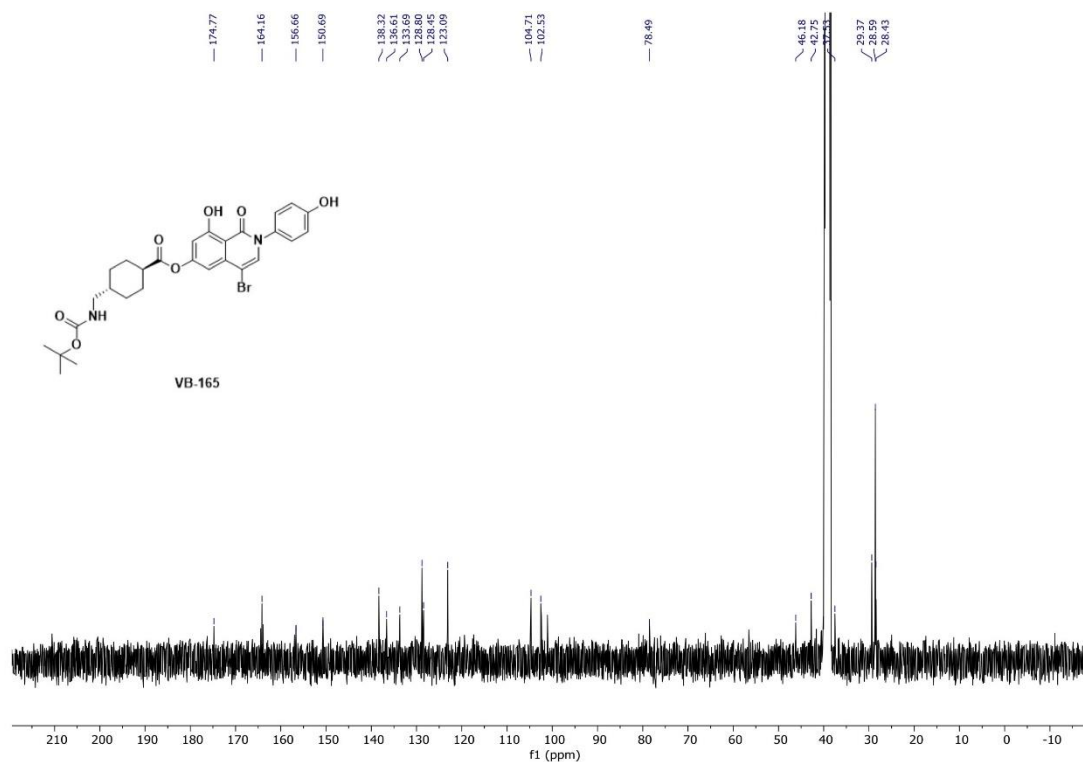

Figure S4. <sup>13</sup>C NMR spectrum for VB-165.

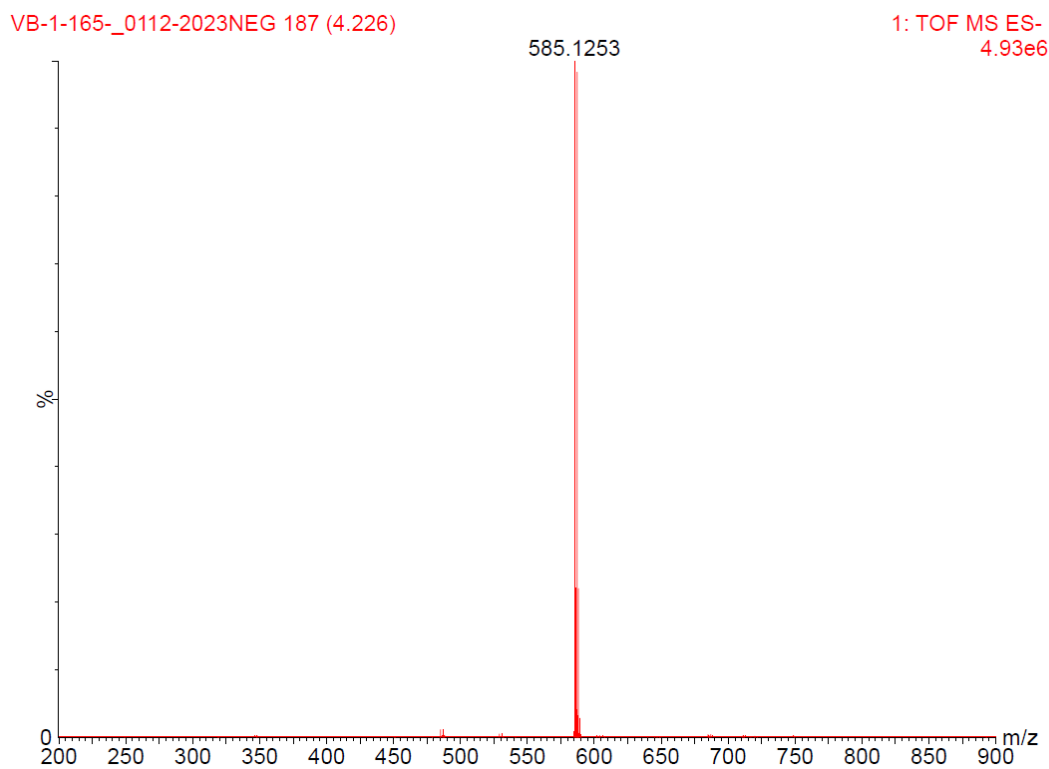

Figure S5. HRMS spectrum for VB-165.

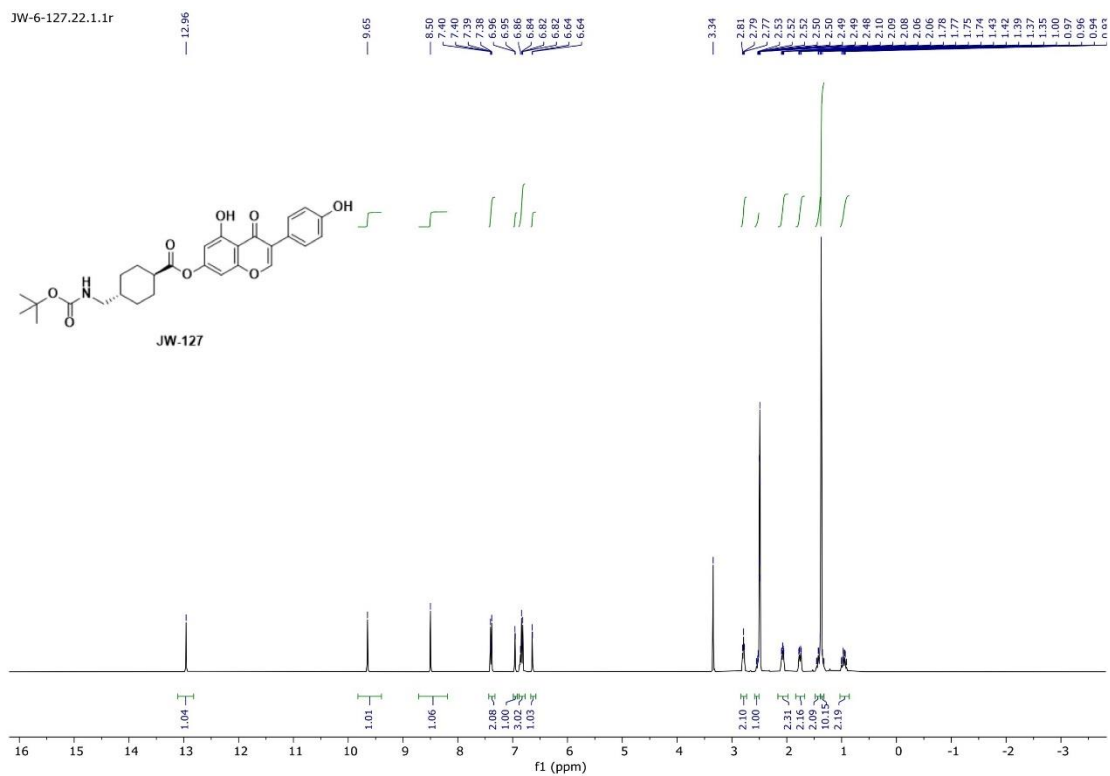

Figure S6.  $^1\text{H}$  NMR spectrum for JW-127.

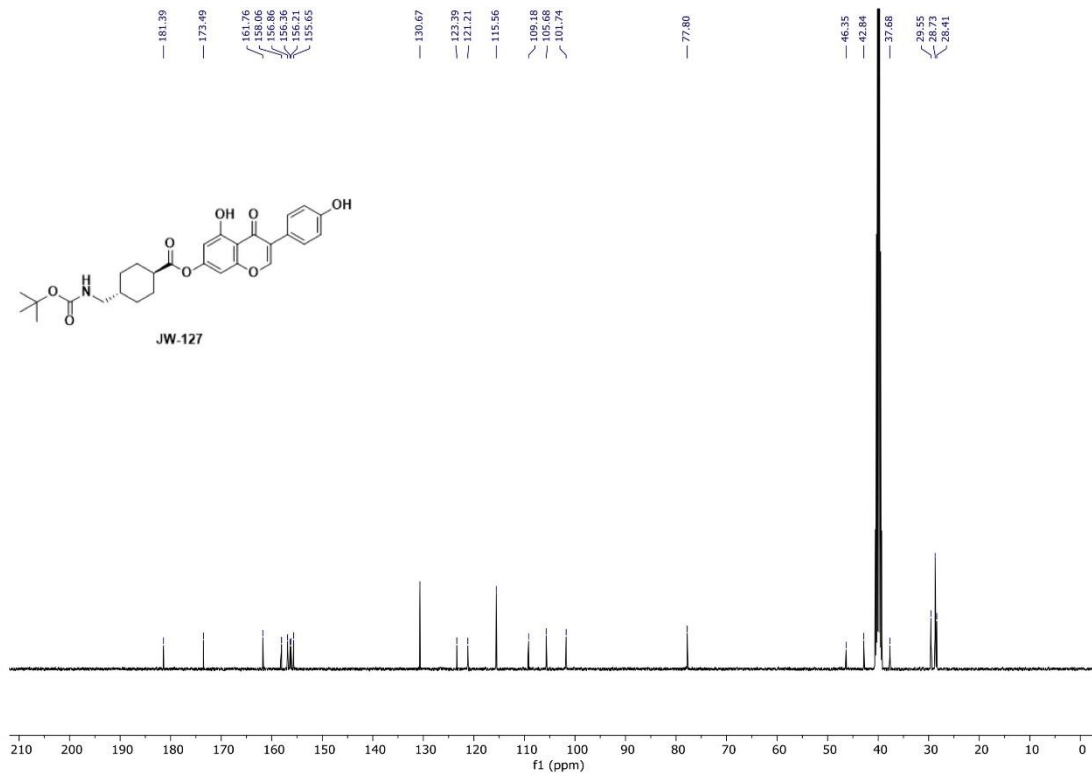

Figure S7.  $^{13}\text{C}$  NMR spectrum for JW-127.

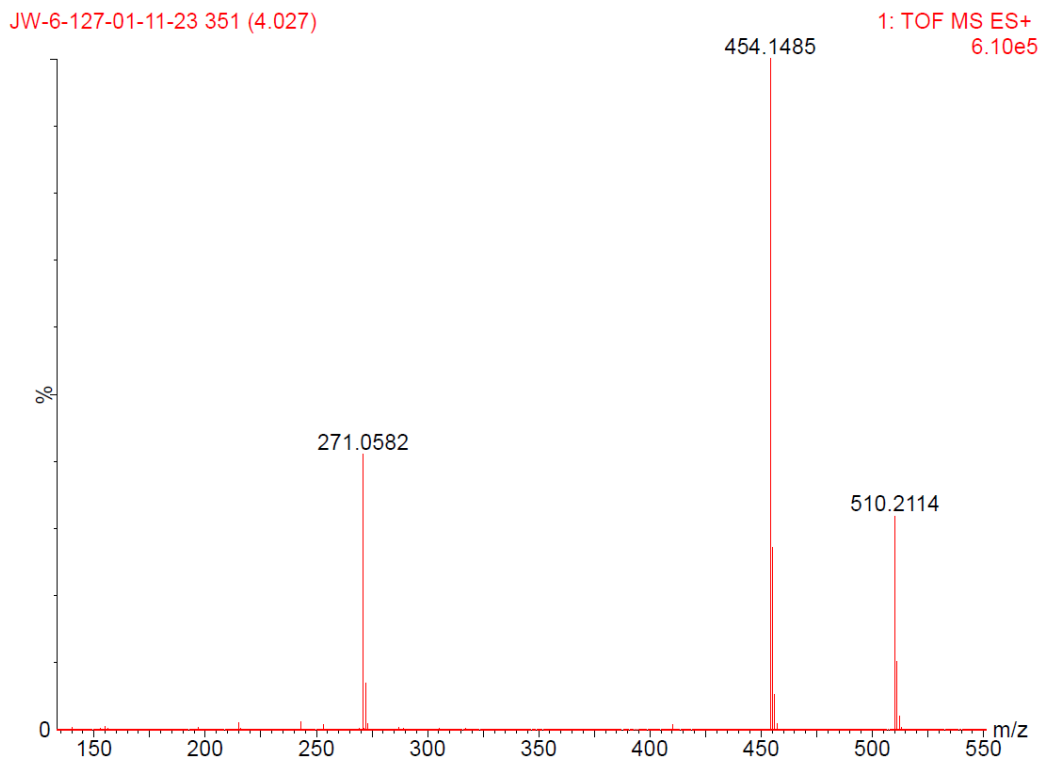

Figure S8. HRMS spectrum for JW-127.

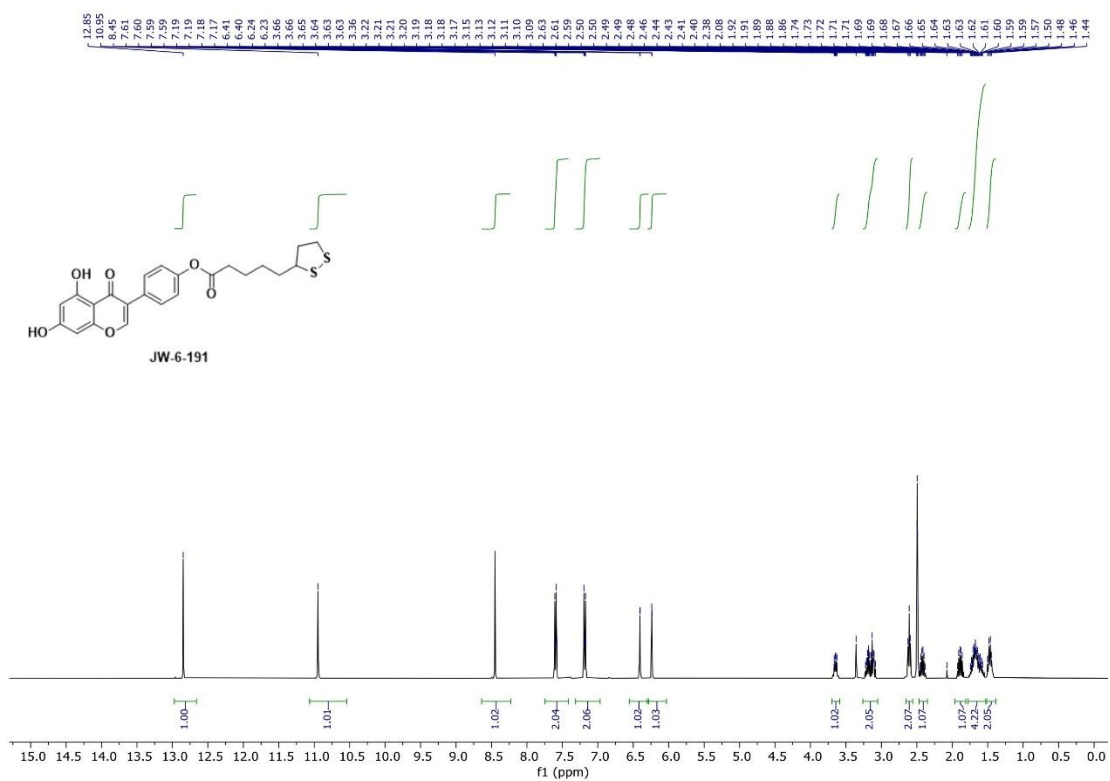

Figure S9.  $^1\text{H}$  NMR spectrum for JW-191.

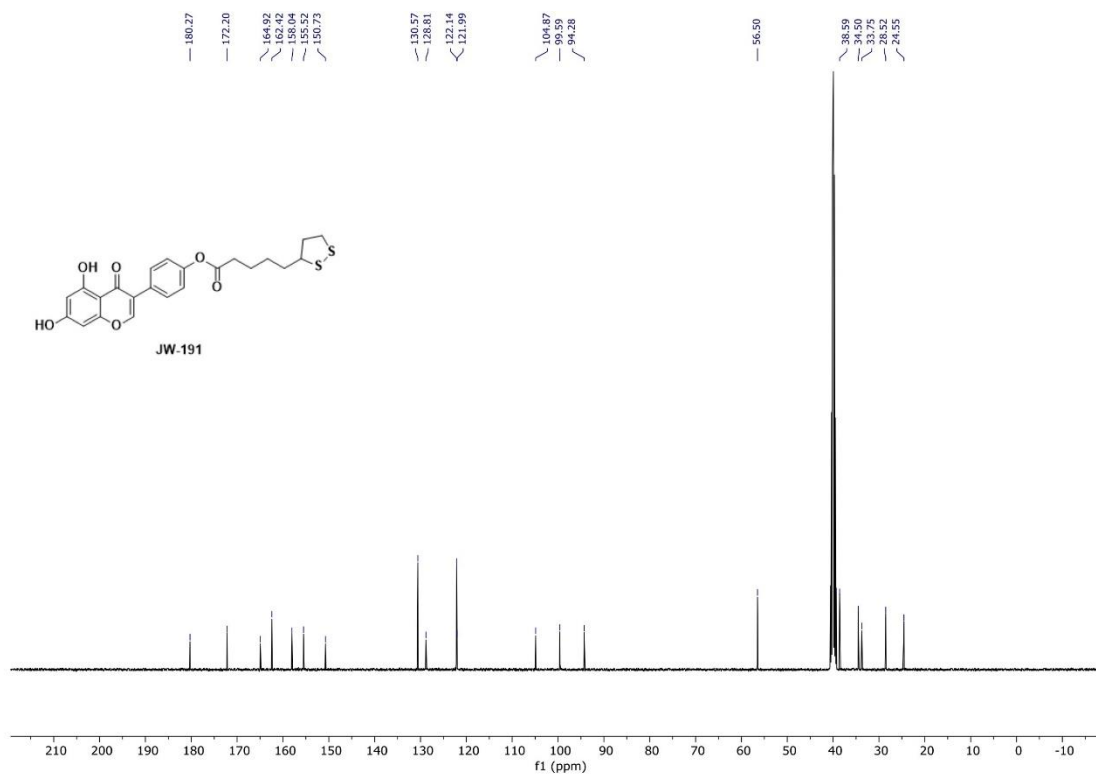

Figure S10. <sup>13</sup>C NMR spectrum for JW-191.

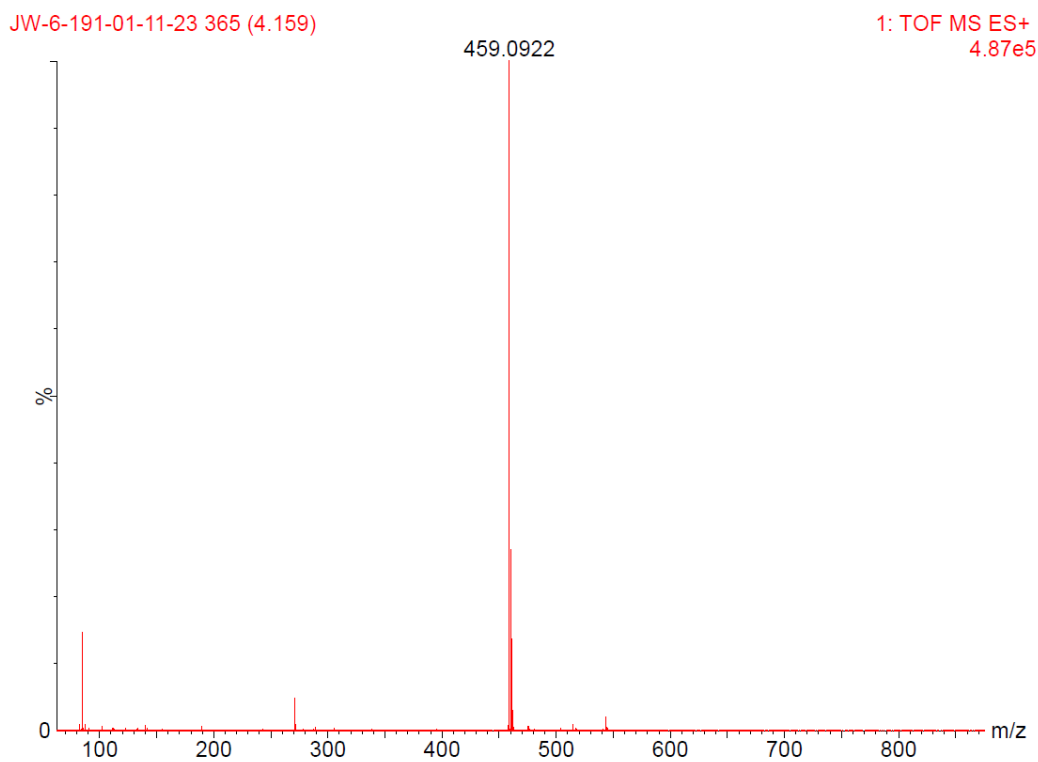

Figure S11. HRMS spectrum for JW-191.
